# Supplementary material for: Parallel evolution in Ugandan crater lakes: repeated evolution of limnetic body shapes in haplochromine cichlid fish
Source: PubMed Central journal article supplement (PMC4322459; doi:10.1186/s12862-015-0287-3), 2015-02-04
Supplement: 12862_2015_287_MOESM1_ESM.pdf [file 12862_2015_287_MOESM1_ESM.pdf]

# Principal Coordinates (PCoA)

Coord. 2

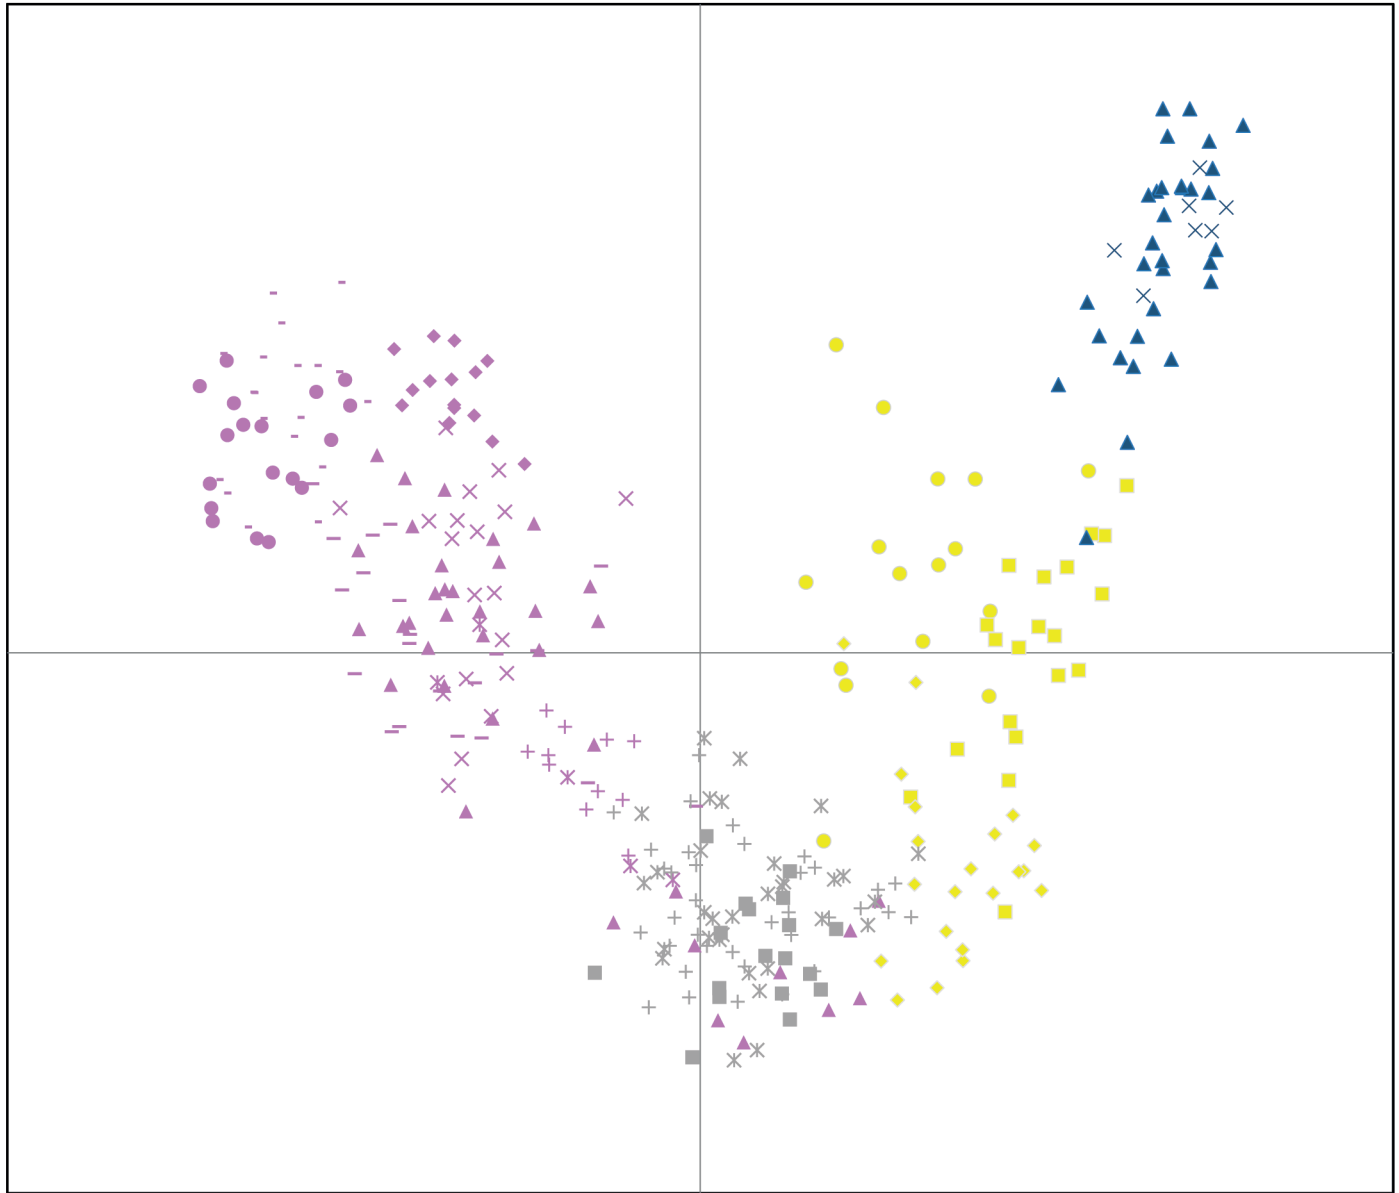

Coord. 1

- CHI
- BUG
- ◆ KAB
- ▲ KAT
- × MIR
- RWI
- MAF
- KAW
- ◆ KAM
- × KIG
- ▲ MUG
- × KAK
- + NKU
- + EDW
- × KAZ
- GEO
