# Supplementary material for: Parallel evolution in Ugandan crater lakes: repeated evolution of limnetic body shapes in haplochromine cichlid fish
Source: PubMed Central journal article supplement (PMC4322459; doi:10.1186/s12862-015-0287-3), 2015-02-04

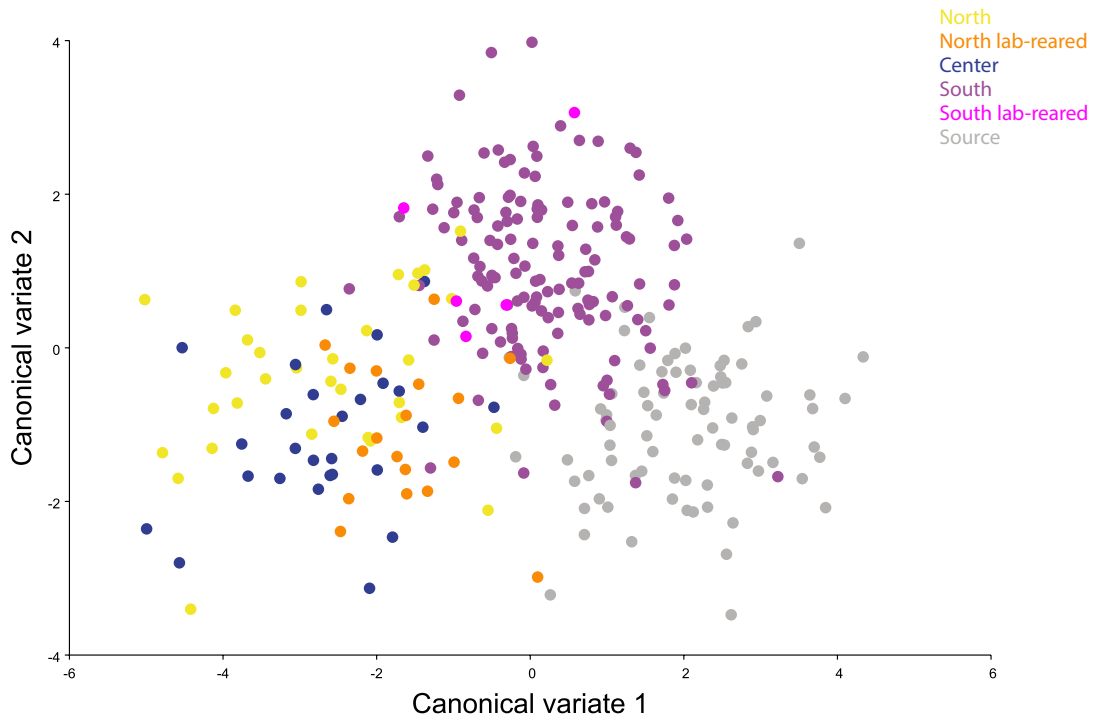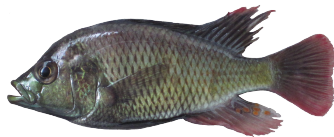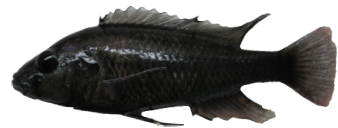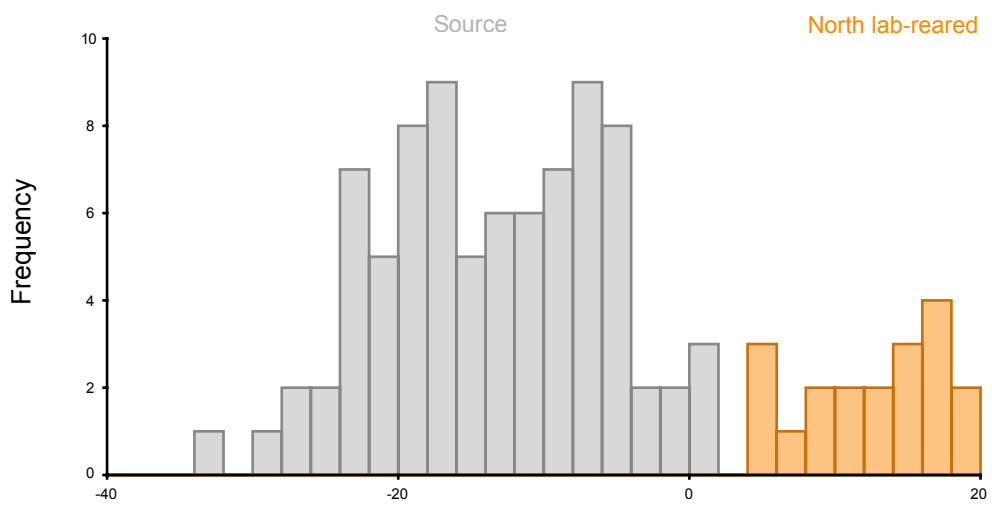

Supplement: 12862_2015_287_MOESM4_ESM.pdf [file 12862_2015_287_MOESM4_ESM.pdf]
